# Supplementary material
Source: PubMed Central journal article supplement (PMC7006347)
Supplement: cm8b04875_si_001.pdf [file cm8b04875_si_001.pdf]

## Supplementary Information

### **<sup>7</sup>Li NMR Chemical Shift Imaging to Detect Microstructural Growth of Lithium in All Solid-State Batteries**

Lauren E. Marbella,<sup>a,†</sup> Stefanie Zekoll,<sup>b,c,†</sup> Jitti Kasemchainan,<sup>b</sup> Steffen P. Emge,<sup>a</sup> Peter G. Bruce,<sup>b,c</sup> Clare P. Grey<sup>\*a,c</sup>

<sup>a</sup>Department of Chemistry, University of Cambridge, Lensfield Road, Cambridge CB2 1EW, United Kingdom

<sup>b</sup>Department of Materials, University of Oxford, Parks Road, Oxford OX1 3PH, UK

<sup>c</sup>The Faraday Institution, Quad One, Harwell Science and Innovation Campus, Didcot, United Kingdom

#### **Table of Contents**

|                                                     |    |
|-----------------------------------------------------|----|
| <b>X-ray diffraction.</b> .....                     | 2  |
| <b>Electrochemical measurements.</b> .....          | 2  |
| <b><sup>7</sup>Li chemical shift imaging.</b> ..... | 10 |

## X-ray diffraction.

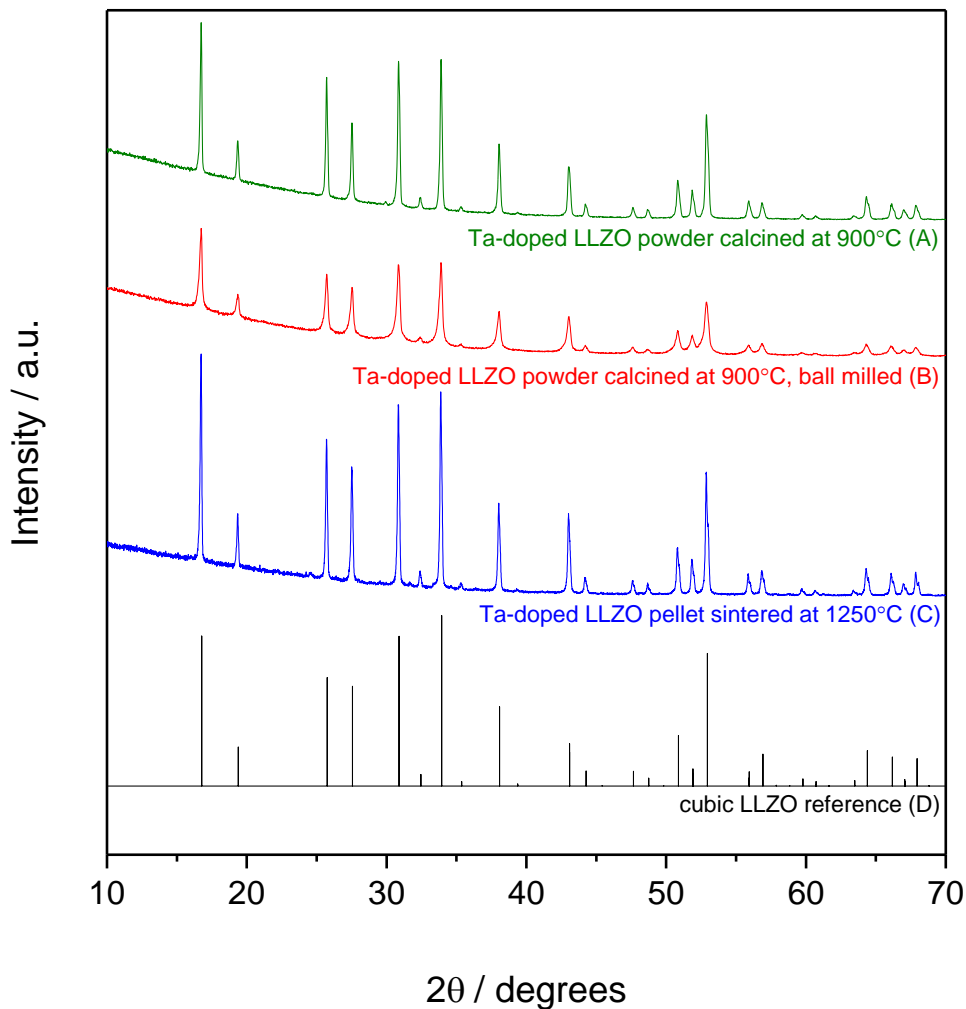

**Figure S1.** XRD patterns of (A) Ta-doped LLZO powder calcined at 900 °C (green), (B) Ta-doped LLZO powder calcined at 900 °C after ball milling (red), (C) Ta-doped LLZO pellet sintered at 1250 °C (blue), and (D) cubic LLZO reference (black).

## Electrochemical measurements.

The voltage profile of the short-circuited Li-LLZTO-Li cell discussed in Figure 1b is shown below (Figure S2). The cell was first cycled at a current density of  $0.2 \text{ mA}\cdot\text{cm}^{-2}$  up to a capacity of

1.0 mAh·cm<sup>-2</sup> for 3 cycles, then at a current density of 0.5 mA·cm<sup>-2</sup> up to a capacity of 1.0 mAh·cm<sup>-2</sup> for 3 cycles, followed by 3 cycles at a current density of 1.0 mA·cm<sup>-2</sup> up to a capacity of 1.0 mAh·cm<sup>-2</sup> and finally, again, at a current density of 0.5 mA·cm<sup>-2</sup> for one discharge until short-circuiting occurred. Due to the increased thickness of this pellet compared to all other pellets used (3.95 mm), the cell lasted for several cycles above 0.5 mA·cm<sup>-2</sup>. Nevertheless, the voltage curves at 1.0 mA·cm<sup>-2</sup> do show significant fluctuations in cell voltage, which suggest extensive dendrite growth is occurring at 1.0 mA·cm<sup>-2</sup>, but that these dendrites have not yet fully reached the other electrode to cause a short circuit due to the increased thickness of the electrolyte. However, applying a current density of 0.5 mA·cm<sup>-2</sup> after cycling at 1.0 mA·cm<sup>-2</sup> instantaneously led to short circuit of the cell.

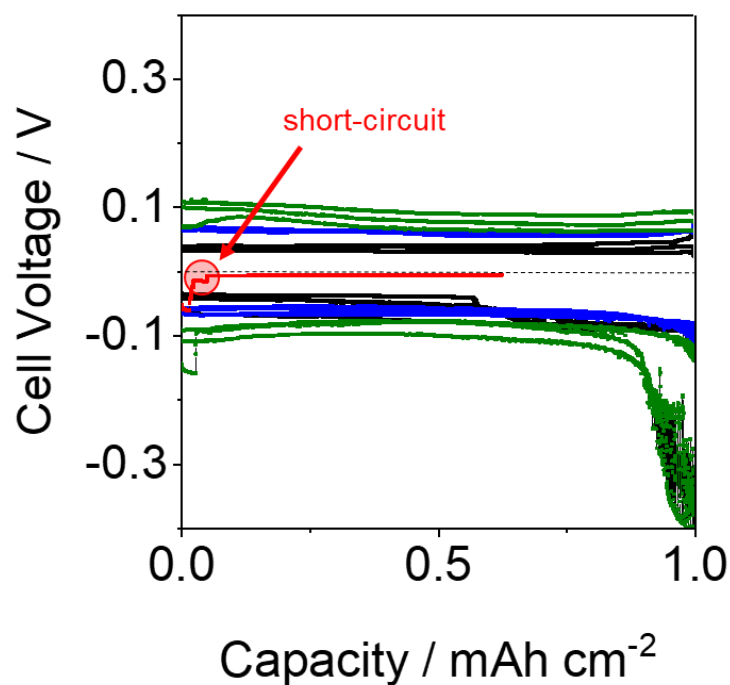

**Figure S2.** Voltage profile of the short circuited Li-LLZTO-Li symmetrical cell discussed in Figure 1c of the main text cycled at  $0.2 \text{ mA}\cdot\text{cm}^{-2}$  up to a capacity of  $1.0 \text{ mAh}\cdot\text{cm}^{-2}$  for 3 cycles (black), followed by  $0.5 \text{ mA}\cdot\text{cm}^{-2}$  up to a capacity of  $1.0 \text{ mAh}\cdot\text{cm}^{-2}$  for 3 cycles (blue),  $1.0 \text{ mA}\cdot\text{cm}^{-2}$  up to a capacity of  $1.0 \text{ mAh}\cdot\text{cm}^{-2}$  for 3 cycles (green) and finally at  $0.5 \text{ mA}\cdot\text{cm}^{-2}$  for one discharge only until short circuit (red).

The relationship between LLZTO thickness and the time the cell takes to short circuit at  $0.5 \text{ mA}\cdot\text{cm}^{-2}$  is shown in Figure S3. The thicker the LLZTO pellet, the longer the cell can be discharged at a current density of  $0.5 \text{ mA}\cdot\text{cm}^{-2}$  before short circuit.

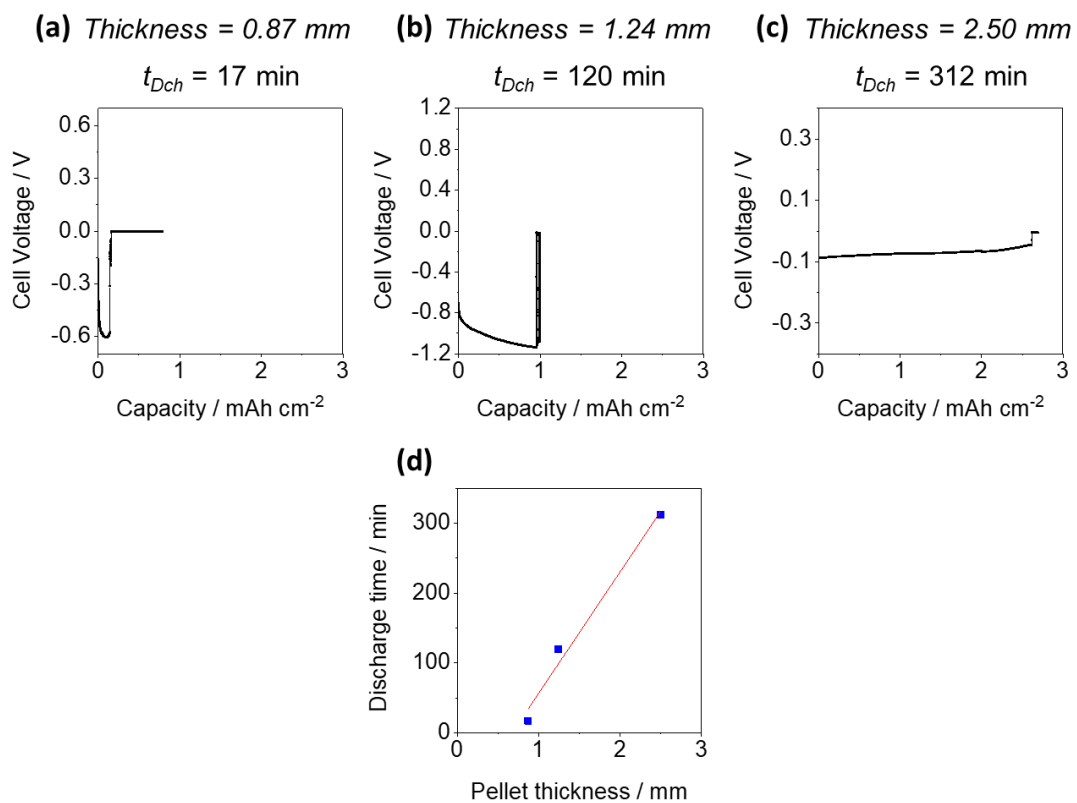

**Figure S3.** Voltage profiles of short circuit Li-LLZTO-Li cells with cell thicknesses of 0.87 mm (a), 1.24 mm (b), and 2.50 mm (c) discharged at 0.5 mA·cm<sup>-2</sup> until short circuit. The linear relationship between pellet thickness and discharge time until short circuit is shown in (d).

**Table S1.** Ionic conductivity and density of the Li-LLZTO-Li pellets shown in Figures 3 and 5 of the main text.

| Figure    | Pellet Name    | Ionic Conductivity (S cm <sup>-1</sup> ) | Density (g cm <sup>-3</sup> ) | % density (theoretical density ~5.31 g cm <sup>-3</sup> ) |
|-----------|----------------|------------------------------------------|-------------------------------|-----------------------------------------------------------|
| Figure 1b | LLZO-211217-6  | /                                        | 4.51                          | 85                                                        |
| Figure 1c | LLZO-290317-1  | $1.2 \times 10^{-3}$                     | 4.70                          | 89                                                        |
| Figure 3a | LLZO-211217-6  | /                                        | 4.51                          | 85                                                        |
| Figure 3b | LLZO-201117-3  | $8.7 \times 10^{-4}$                     | 4.80                          | 90                                                        |
| Figure 3c | LLZO-201117-1  | $1.4 \times 10^{-3}$                     | 4.76                          | 90                                                        |
| Figure 3d | LLZO-211217-5  | $6.1 \times 10^{-4}$                     | 4.80                          | 90                                                        |
| Figure 3e | LLZO-211217-2b | $5.5 \times 10^{-4}$                     | 4.65                          | 88                                                        |
| Figure 3f | LLZO-201217-1c | $8.6 \times 10^{-4}$                     | 4.76                          | 90                                                        |
| Figure 3g | LLZO-211217-3a | $1.2 \times 10^{-3}$                     | 4.62                          | 87                                                        |
| Figure 5a | LLZO-090318-1  | $1.2 \times 10^{-3}$                     | 4.56                          | 86                                                        |
| Figure 5b | LLZO-090318-2  | $1.4 \times 10^{-3}$                     | 4.62                          | 87                                                        |

**Table S2.** EIS analysis of the Li-LLZTO-Li cells in Figure 3 of the main text at various time points during their cycling, where the resistances, R1–R3 (bulk, grain boundary and interface, respectively) and capacitances C1–C3, for the three constant phase elements are defined in Figure S4.

| Figure 3b                         |        |        | Figure 3c                         |        |        |
|-----------------------------------|--------|--------|-----------------------------------|--------|--------|
| Cycle time (min)                  | 0      | 30     | Cycle time (min)                  | 0      | 120    |
| R1 ( $\Omega\cdot\text{cm}$ )     | 849    | 778    | R1 ( $\Omega\cdot\text{cm}$ )     | 434    | 483    |
| C1 (F/cm)                         | 2.E-09 | 1.E-08 | C1 (F/cm)                         | 1.E-09 | 1.E-09 |
| R2 ( $\Omega\cdot\text{cm}$ )     | 290    | 226    | R2 ( $\Omega\cdot\text{cm}$ )     | 253    | 144    |
| C2 (F/cm)                         | 6.E-08 | 6.E-08 | C2 (F/cm)                         | 1.E-08 | 3.E-08 |
| R3 ( $\Omega\cdot\text{cm}^2$ )   | 27     | 34     | R3 ( $\Omega\cdot\text{cm}^2$ )   | 14     | 47     |
| C3 (F/cm <sup>2</sup> )           | 4.E-02 | 1.E-01 | C3 (F/cm <sup>2</sup> )           | 9.E-03 | 2.E-01 |
| Rtotal ( $\Omega\cdot\text{cm}$ ) | 1249   | 1138   | Rtotal ( $\Omega\cdot\text{cm}$ ) | 743    | 813    |

| Figure 3d                         |        |        |        |
|-----------------------------------|--------|--------|--------|
| Cycle time (min)                  | 0      | 120    | 240    |
| R1 ( $\Omega\cdot\text{cm}$ )     | 1002   | 525    | 666    |
| C1 (F/cm)                         | 7.E-10 | 7.E-10 | 7.E-10 |
| R2 ( $\Omega\cdot\text{cm}$ )     | 600    | 344    | 184    |
| C2 (F/cm)                         | 1.E-08 | 3.E-08 | 8.E-09 |
| R3 ( $\Omega\cdot\text{cm}^2$ )   | 50     | 69     | 65     |
| C3 (F/cm <sup>2</sup> )           | 9.E-04 | 1.E-02 | 9.E-01 |
| Rtotal ( $\Omega\cdot\text{cm}$ ) | 1829   | 1179   | 1140   |

| Figure 3e                         |        |        |        |                  |
|-----------------------------------|--------|--------|--------|------------------|
| Cycle time (min)                  | 0      | 120    | 240    | 293              |
| R1 ( $\Omega\cdot\text{cm}$ )     | 1054   | 645    | 669    | EIS not recorded |
| C1 (F/cm)                         | 9.E-10 | 9.E-10 | 9.E-10 |                  |
| R2 ( $\Omega\cdot\text{cm}$ )     | 673    | 429    | 354    |                  |
| C2 (F/cm)                         | 2.E-08 | 3.E-08 | 5.E-09 |                  |
| R3 ( $\Omega\cdot\text{cm}^2$ )   | 41     | 43     | 48     |                  |
| C3 (F/cm <sup>2</sup> )           | 2.E-04 | 2.E-01 | 8.E-04 |                  |
| Rtotal ( $\Omega\cdot\text{cm}$ ) | 1883   | 1236   | 1203   |                  |

| Figure 3f                         |        |        |            |        |            |
|-----------------------------------|--------|--------|------------|--------|------------|
| Cycle time (min)                  | 0      | 120    | 240        | 360    | 480        |
| R1 ( $\Omega\cdot\text{cm}$ )     | 616    | 476    | 483        | 285    | 439        |
| C1 (F/cm)                         | 9.E-10 | 8.E-10 | 9.E-10     | 1.E-09 | 9.E-10     |
| R2 ( $\Omega\cdot\text{cm}$ )     | 536    | 136    | 293        | 192    | 264        |
| C2 (F/cm)                         | 1.E-08 | 6.E-08 | 6.E-09     | 4.E-09 | 6.E-09     |
| R3 ( $\Omega\cdot\text{cm}^2$ )   | 39     | 23     | <b>129</b> | 63     | <b>188</b> |
| C3 (F/cm <sup>2</sup> )           | 2.E-03 | 2.E+01 | 7.E+00     | 5.E+00 | 1.E+00     |
| Rtotal ( $\Omega\cdot\text{cm}$ ) | 1314   | 705    | 1305       | 734    | 1472       |

| Figure 3g                         |        |        |        |        |            |        |                                                |
|-----------------------------------|--------|--------|--------|--------|------------|--------|------------------------------------------------|
| Cycle time (min)                  | 0      | 120    | 240    | 360    | 480        | 600    | 720                                            |
| R1 ( $\Omega\cdot\text{cm}$ )     | 505    | 406    | 358    | 337    | 270        | 165    | no data fitting possible, cell short-circuited |
| C1 (F/cm)                         | 1.E-09 | 1.E-09 | 1.E-09 | 9.E-10 | 1.E-09     | 7.E-10 |                                                |
| R2 ( $\Omega\cdot\text{cm}$ )     | 357    | 160    | 138    | 48     | 150        | 2      |                                                |
| C2 (F/cm)                         | 6.E-09 | 8.E-09 | 5.E-09 | 3.E-08 | 4.E-09     | 5.E-05 |                                                |
| R3 ( $\Omega\cdot\text{cm}^2$ )   | 12     | 11     | 54     | 62     | <b>272</b> | 8      |                                                |
| C3 (F/cm <sup>2</sup> )           | 5.E-03 | 9.E-03 | 7.E-01 | 1.E+02 | 2.E+03     | 1.E+00 |                                                |
| Rtotal ( $\Omega\cdot\text{cm}$ ) | 905    | 608    | 699    | 618    | 1436       | 196    |                                                |

An equivalent circuit composed of a series of three resistors and constant-phase elements in parallel to account for the bulk (R1), grain boundary (R2), and interface (R3) resistances present within the cell was used to fit the data (see schematic below) The capacitance values for each resistance are labeled as C1, C2, and C3, respectively. The total resistance of the cell ( $R_{total}$ ) for each time point is also calculated.

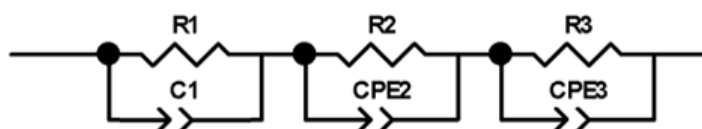

**Figure S4.** Schematic of the equivalent circuit composed of a series of three resistors and constant-phase elements in parallel to account for the bulk (R1), grain boundary (R2) and interface (R3) resistances present within the cell was used to fit EIS data.

Significant increases in the interface resistance (R3) are labelled in red in Table S2. It should be noted that low frequency behaviors in Nyquist plots such as the interface resistance are much harder to fit than the bulk and grain boundary resistances, at least for our data, and therefore should not be regarded as absolute. Additionally, from our EIS analysis and voltage profiles of the cells in Figure 3, it is only just before cell failure that major changes in the EIS or cell voltage are observed. No information on the initial growth of microstructural Li can be extracted. Hence,  $^7\text{Li}$  CSI could, in the long run, be more useful in providing a new dimension to study dendrite growth and cell failure, especially at visualizing Li metal growth at the very early stages of cycling.

All Nyquist plots obtained during cycling of cells in Figure 3f and 3g of the main text are shown in Figure S5. These plots show alternating higher and lower total impedances depending



on the current direction for the cell in Figure 3f, and a clear decrease in total impedance for the cell in Figure 3g as current is passed. Both Nyquist plots after 600 minutes and 720 minutes for the cell in Figure 3g suggest that a short-circuit has occurred.

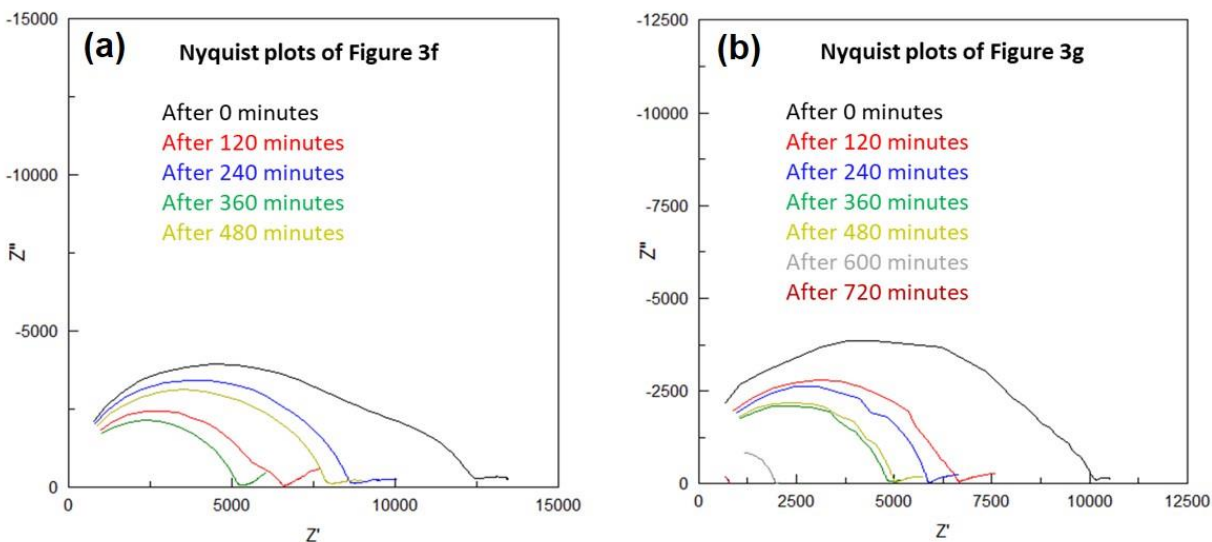

**Figure S5.** Nyquist plots at different stages of cycling for the Li-LLZTO-Li cells shown in the main text Figure 3f (a) and 3g (b).

**Table S3.** EIS measurements for the Li-LLZTO-Li cell shown in Figure 4.

|                              | From EIS measurements     |                                | From voltage curves                        |
|------------------------------|---------------------------|--------------------------------|--------------------------------------------|
|                              | Total Resistance (Ohm cm) | $\sigma$ (S cm <sup>-1</sup> ) | Cell Voltage at the end of each cycle (mV) |
| After cell-assembly          | 868                       | $1.2 \times 10^{-3}$           | /                                          |
| After 1 <sup>st</sup> cycle  | 852                       | $1.2 \times 10^{-3}$           | 59.9                                       |
| After 2 <sup>nd</sup> cycle  | 805                       | $1.2 \times 10^{-3}$           | 57.1                                       |
| After 3 <sup>rd</sup> cycle  | 790                       | $1.3 \times 10^{-3}$           | 55.9                                       |
| After 5 <sup>th</sup> cycle  | 620                       | $1.6 \times 10^{-3}$           | 48.3                                       |
| After 10 <sup>th</sup> cycle | 542                       | $1.8 \times 10^{-3}$           | 42.0                                       |
| After 20 <sup>th</sup> cycle | 488                       | $2.0 \times 10^{-3}$           | 37.6                                       |
| After 30 <sup>th</sup> cycle | 491                       | $2.0 \times 10^{-3}$           | 38.2                                       |
| After 40 <sup>th</sup> cycle | 523                       | $1.9 \times 10^{-3}$           | 39.2                                       |

## $^7\text{Li}$ chemical shift imaging.

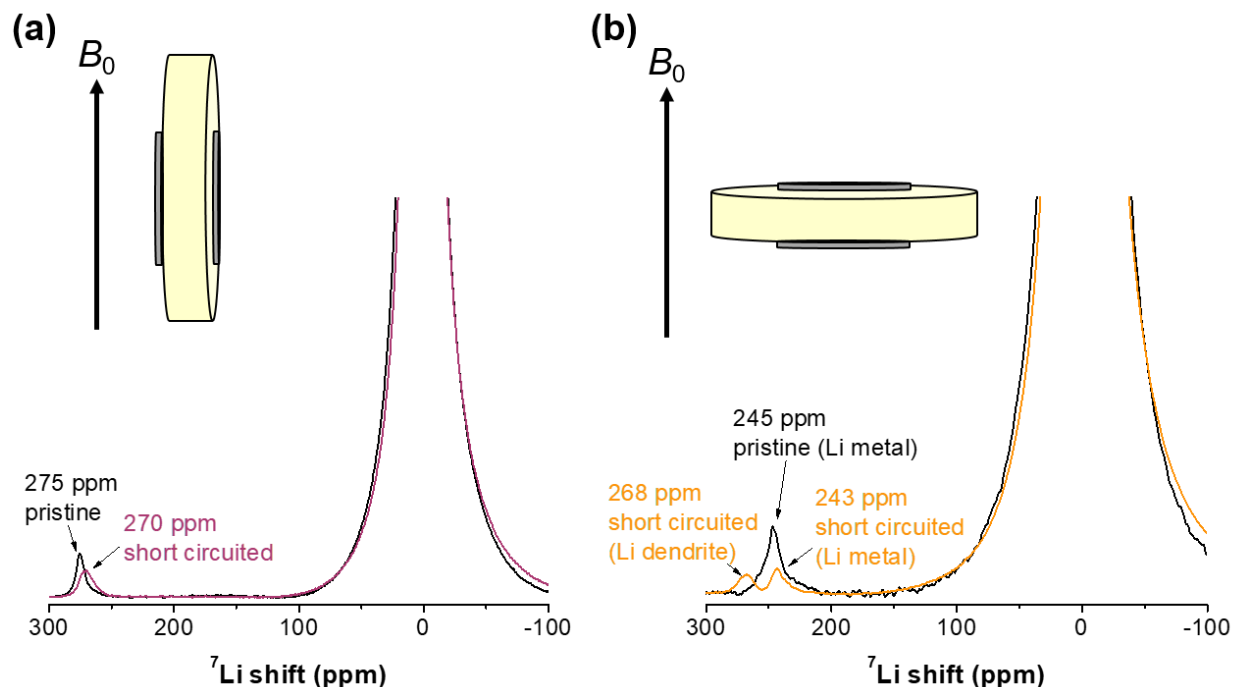

**Figure S6.**  $^7\text{Li}$  NMR of pristine (black) and short circuited (purple in (a) and orange in (b)) Li-LLZTO-Li symmetrical cells with the electrodes oriented (a) parallel and (b) perpendicular to  $B_0$ .

Figure S6 illustrates the effect of orientation on the shift of the Li metal signal. If the electrodes were oriented parallel to  $B_0$ , the resolution between the dendrites and the Li metal electrodes was significantly worse than the perpendicular orientation (Figure S6). For each sample, single pulse  $^7\text{Li}$  NMR spectra were collected with a recycle delay of 1 s and 2048 scans. Typical  $90^\circ$  radiofrequency (rf) pulses were approximately  $12\ \mu\text{s}$  for  $^7\text{Li}$ .  $^7\text{Li}$  CSI were recorded using a single phase encoded spatial dimension.<sup>1</sup> Typical experiment times for  $^7\text{Li}$  CSI ranged from *ca.* 7–15 h. Suitable signal could be achieved within 1–2 h for most samples, but longer experiments were run to collect additional signal from low intensity Li dendrite species (and to ensure their absence at low cycling times).

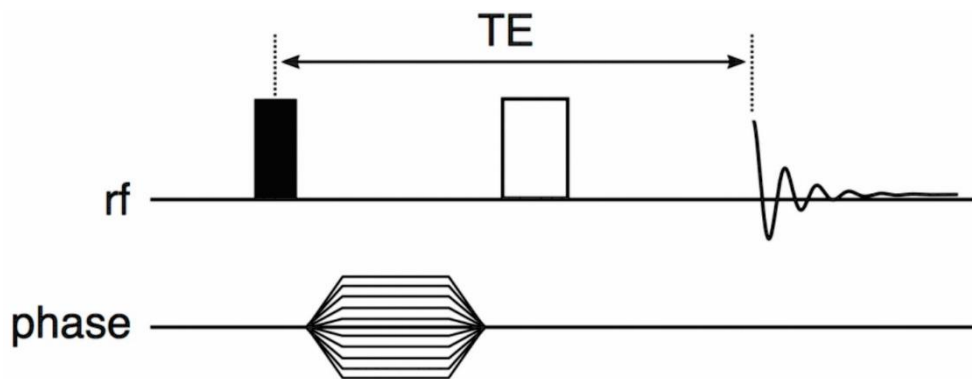

**Figure S7.** Pulse sequence used for  $^7\text{Li}$  chemical shift imaging experiments with a single phase-encoded spatial dimension. The black rectangle represents  $90^\circ$  rf pulses, whereas the white rectangle represents a  $180^\circ$  rf pulse. Figure reproduced with permission from ref 1. Copyright 2015 American Chemical Society.

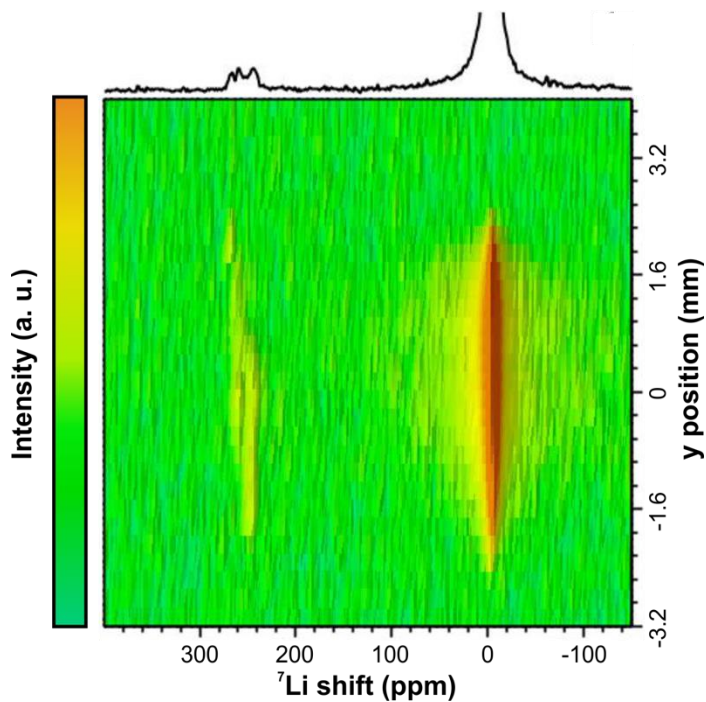

**Figure S8.** Li-LLZTO-Li symmetrical cell cycled at a current density of  $0.2 \text{ mA}\cdot\text{cm}^{-2}$  to  $1.0 \text{ mA}\cdot\text{cm}^{-2}$  until short-circuit (same cell as Figure 1c).  $^7\text{Li}$  MRI was performed in the y dimension to show lateral information.

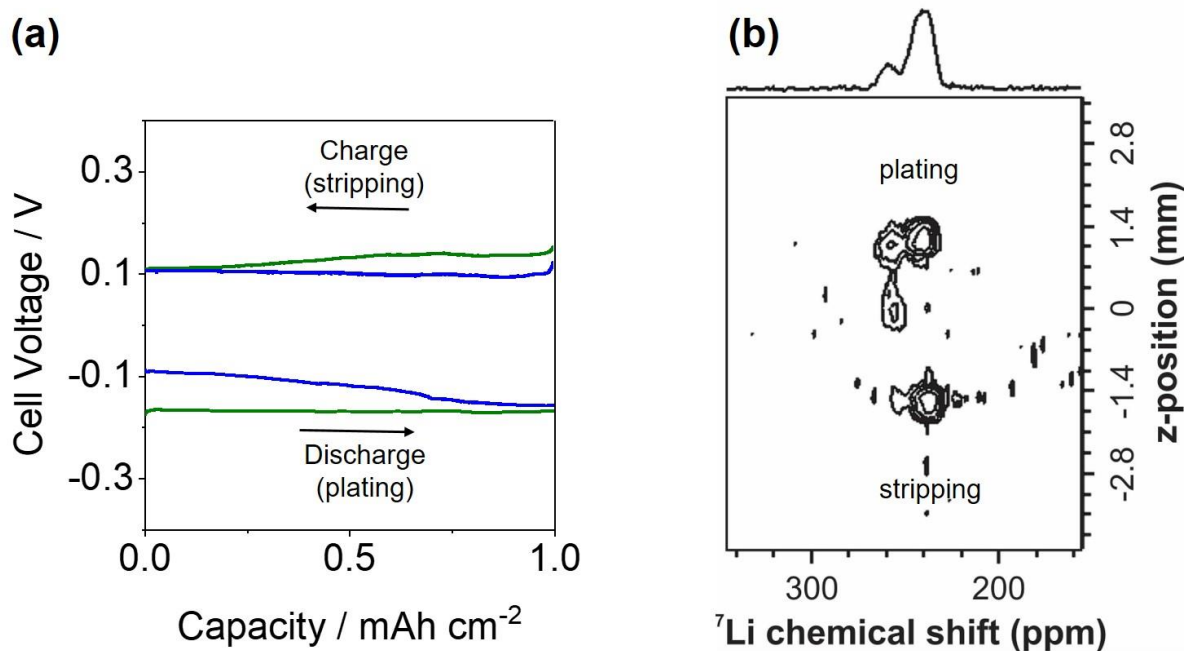

**Figure S9.** (a) Galvanostatic cycling at 0.5 mA/cm<sup>2</sup> for up to 2 h per charge/discharge with the first cycle shown in green and the second cycle shown in blue. The cell was stopped at  $t_{\text{cyc}} = 480$  min and analyzed with (b) <sup>7</sup>Li CSI.

## References

1. Chang, H. J.; Ilott, A. J.; Trease, N. M.; Mohammadi, M.; Jerschow, A.; Grey, C. P., Correlating Microstructural Lithium Metal Growth with Electrolyte Salt Depletion in Lithium Batteries Using <sup>7</sup>Li MRI. *J. Am. Chem. Soc.* **2015**, *137*, 15209-15216.
